# Supplementary material for: INS GFP/w human embryonic stem cells facilitate isolation of in vitro derived insulin-producing cells
Source: Springer Nature journal article supplement (doi:10.1007/s00125-011-2379-y), 2011-11-25
Supplement: MOESM3 [file 8090482]

# Supplementary Figure 3

**a**

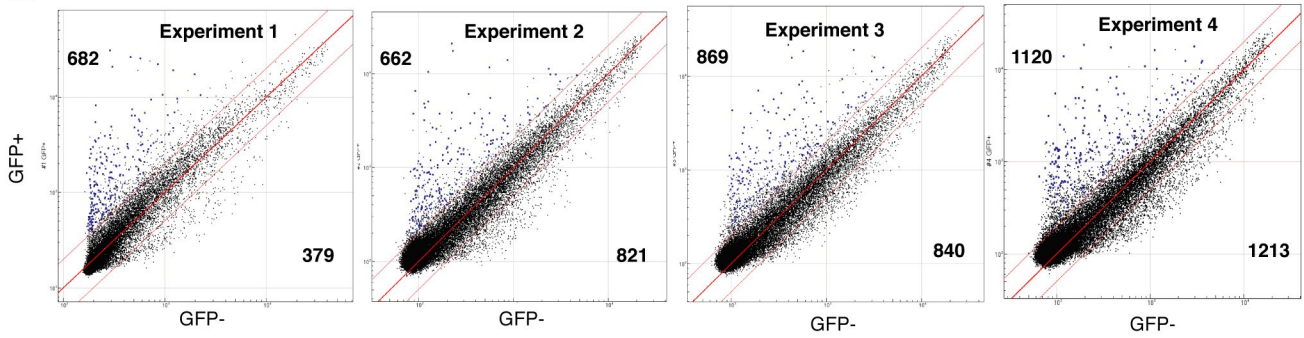

**b**

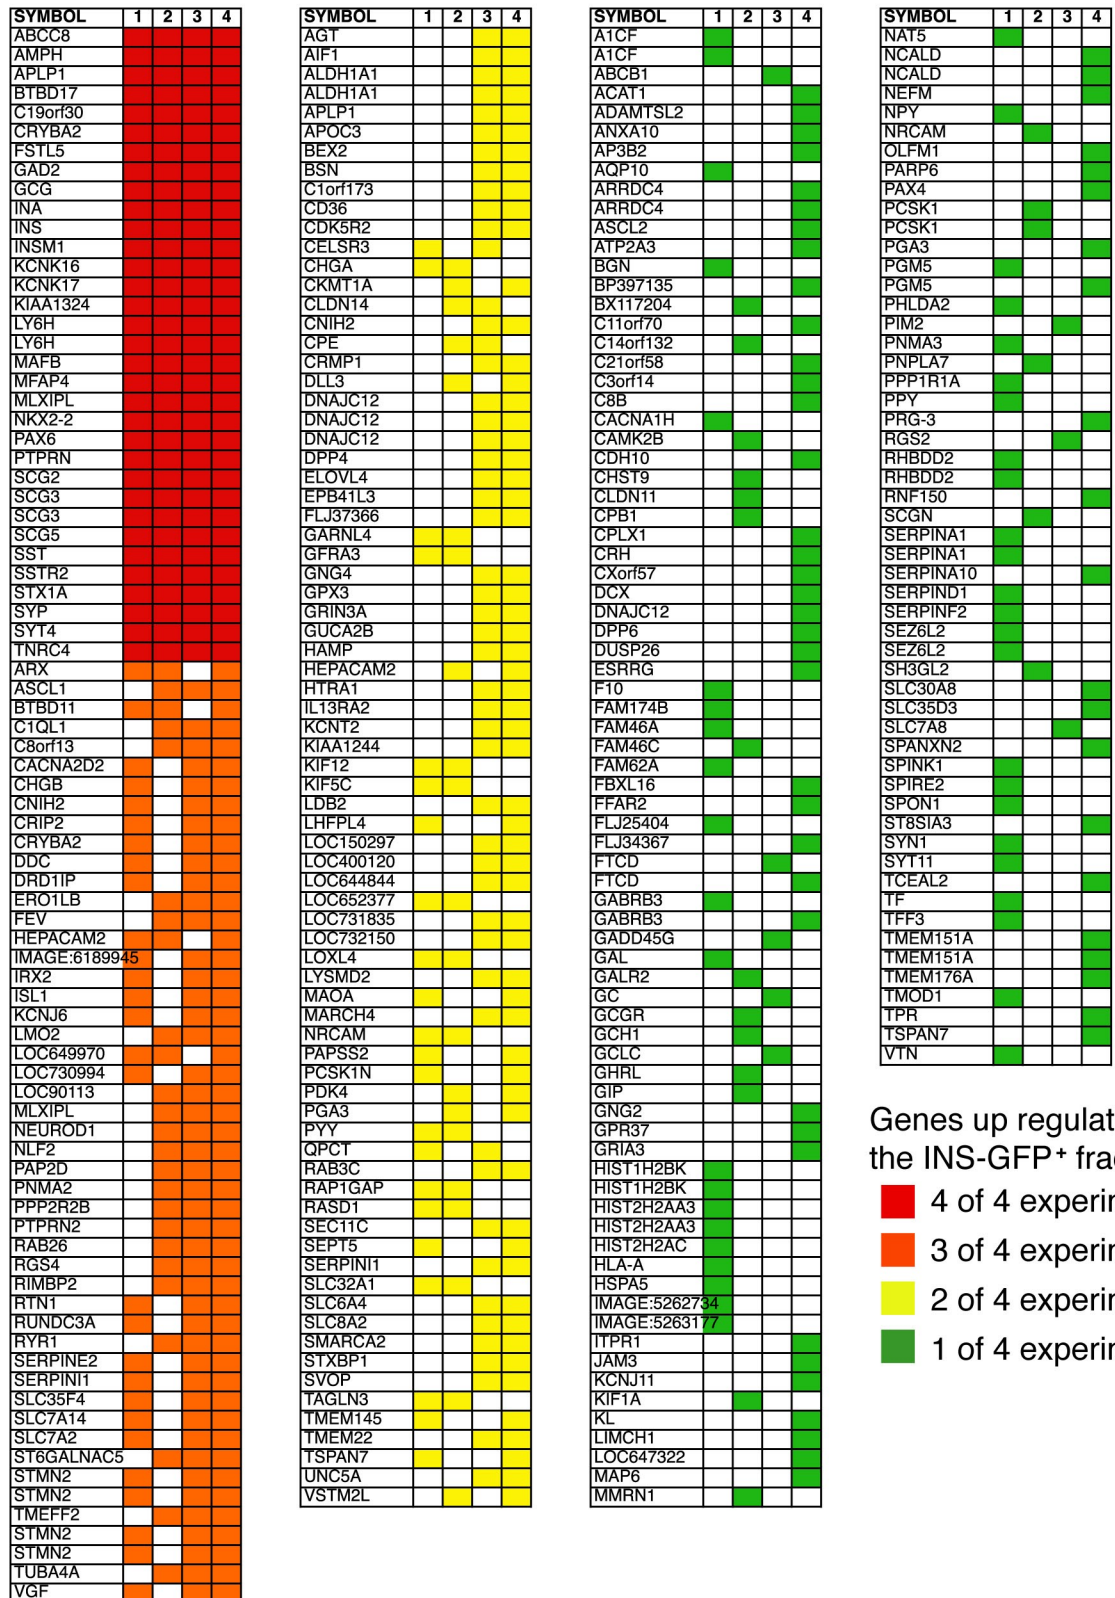

Genes up regulated in the INS-GFP<sup>+</sup> fraction in:

- 4 of 4 experiments
- 3 of 4 experiments
- 2 of 4 experiments
- 1 of 4 experiments
