# Supplementary figures and images for: INS GFP/w human embryonic stem cells facilitate isolation of in vitro derived insulin-producing cells
Source: Springer Nature journal article supplement (doi:10.1007/s00125-011-2379-y), 2011-11-25

Supplementary Figure 1

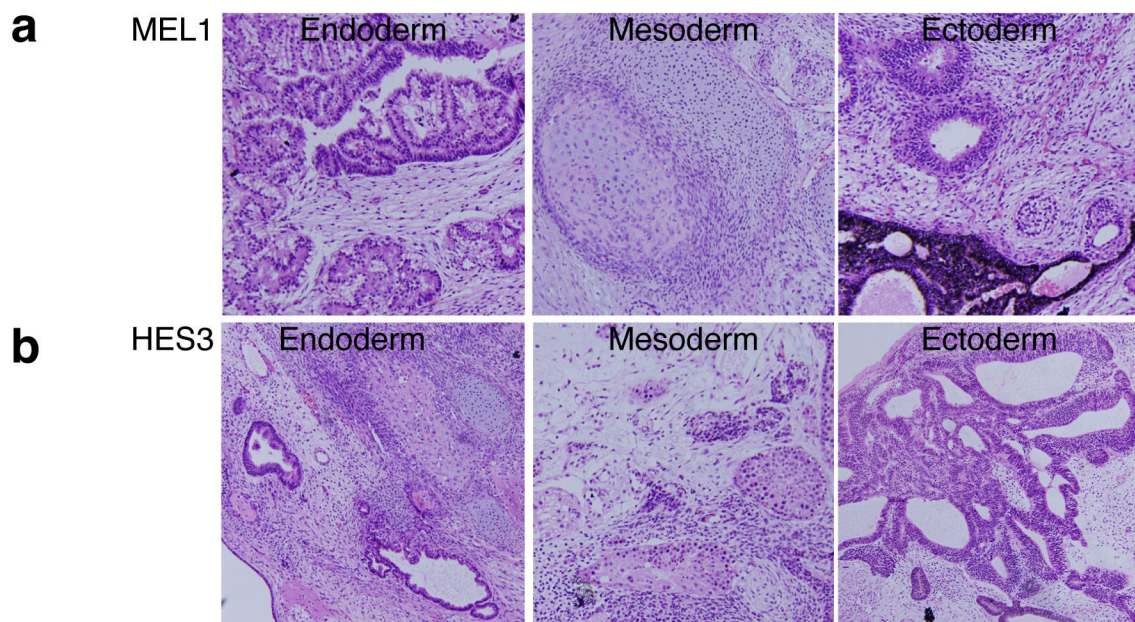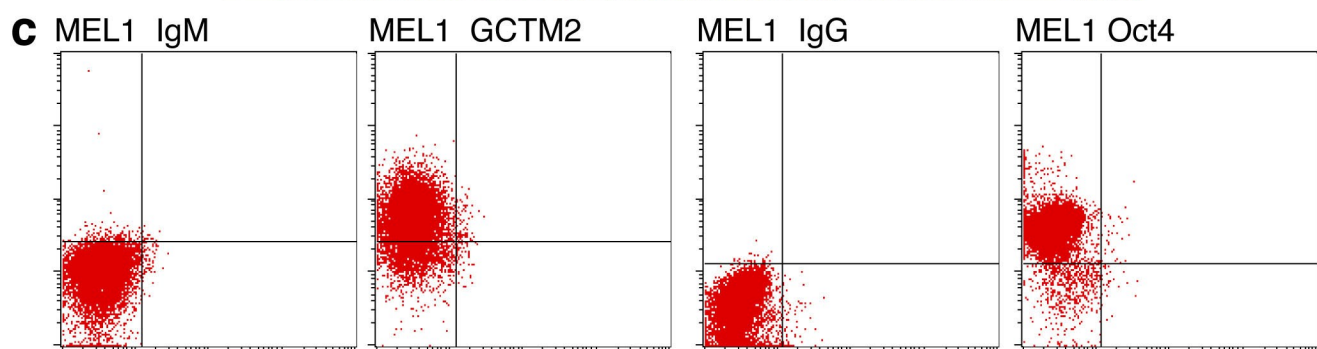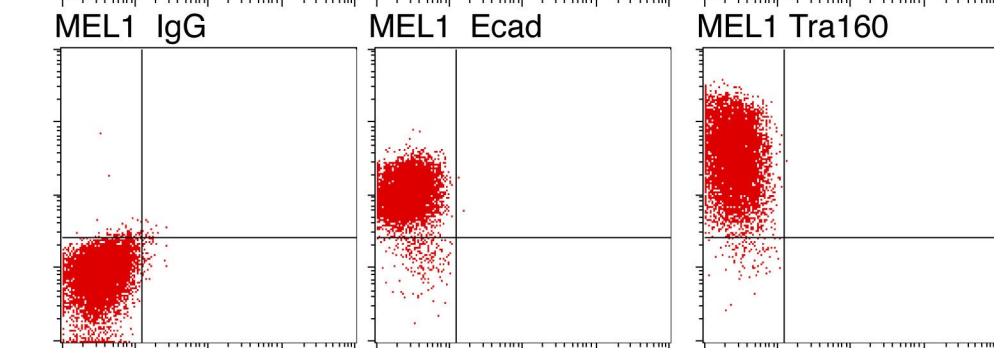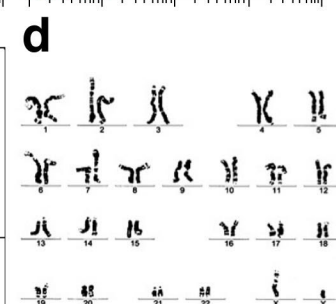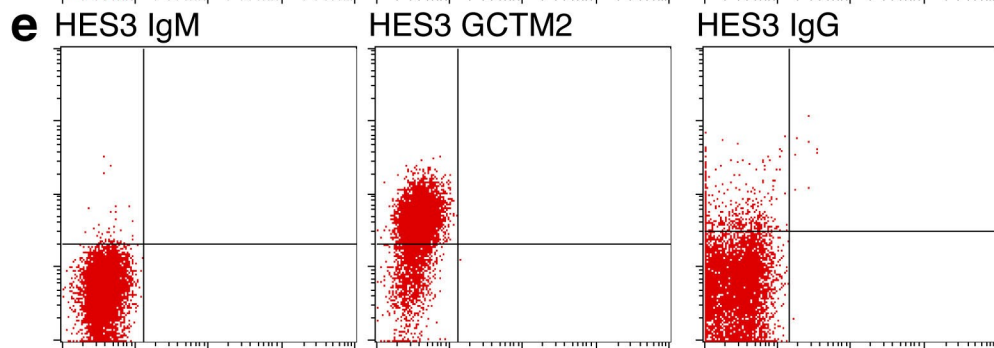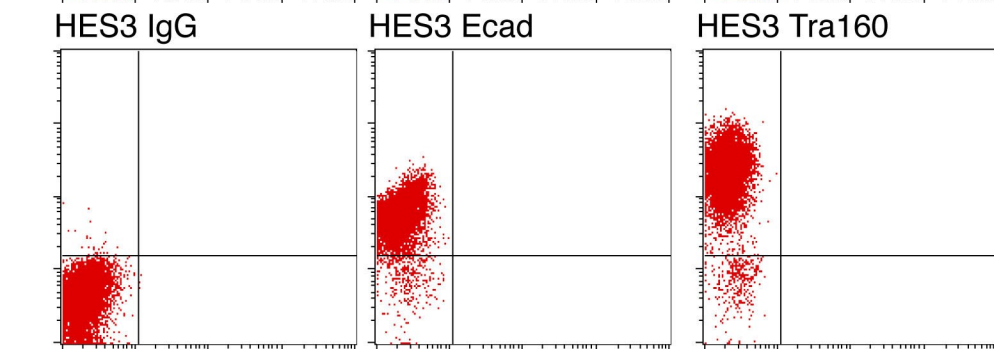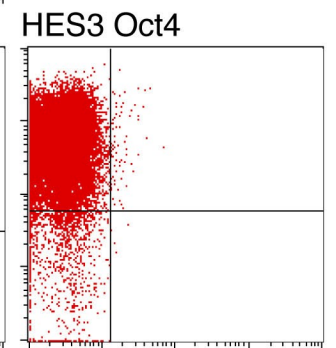

Supplement: MOESM1 [file 8090482]

# Supplementary Figure 4

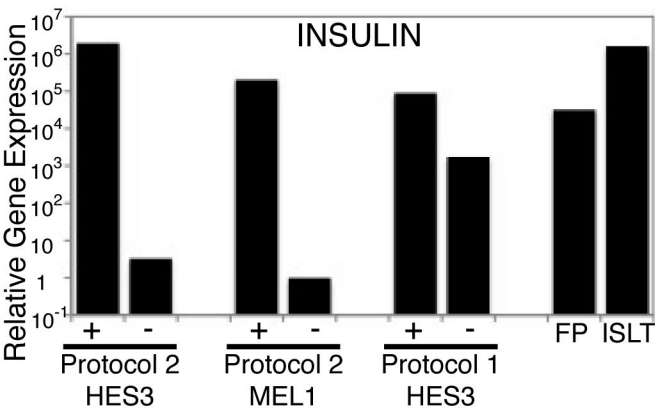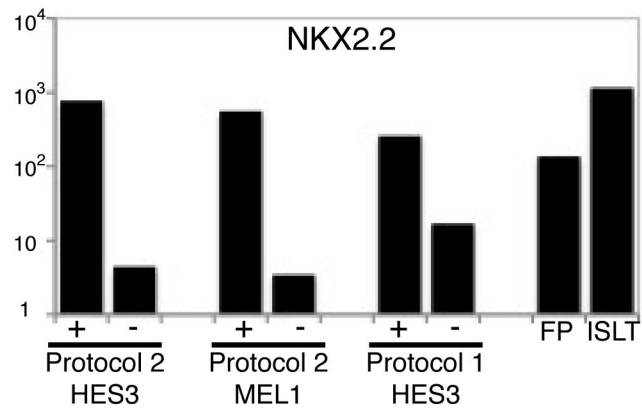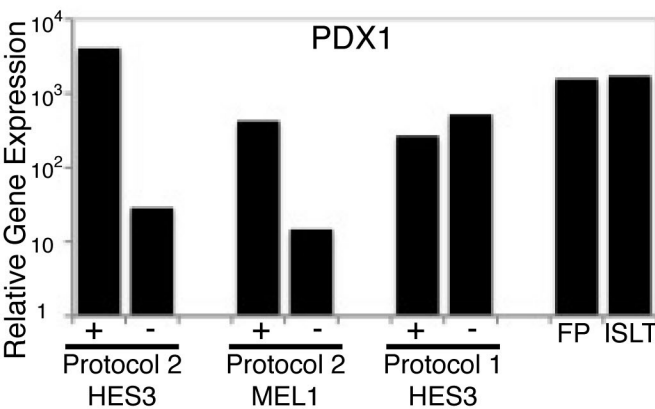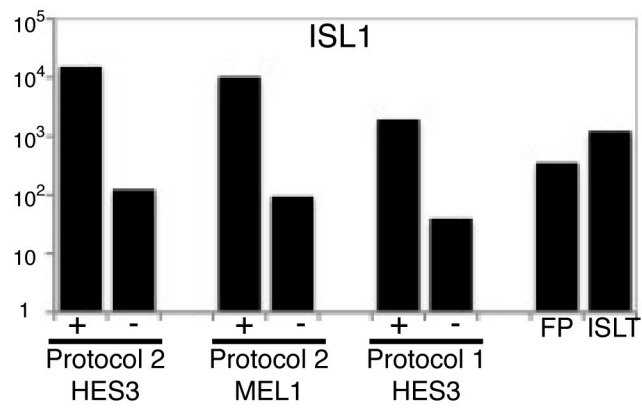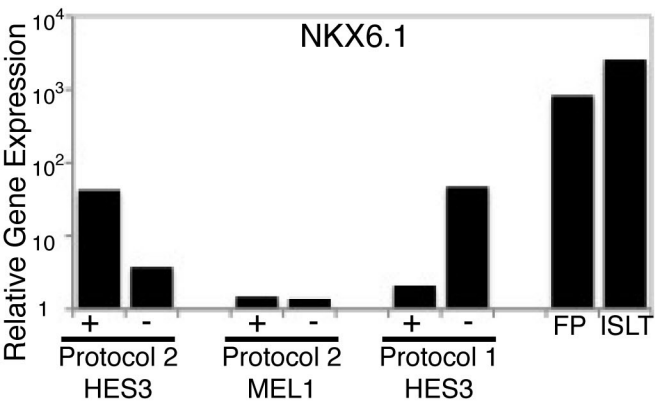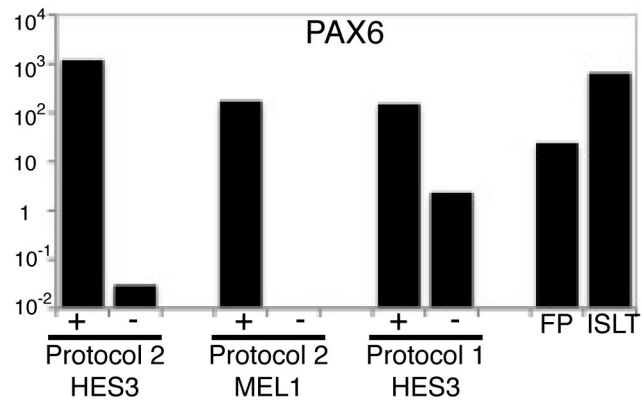

Supplement: MOESM4 [file 8090482]

Supplementary Figure 5

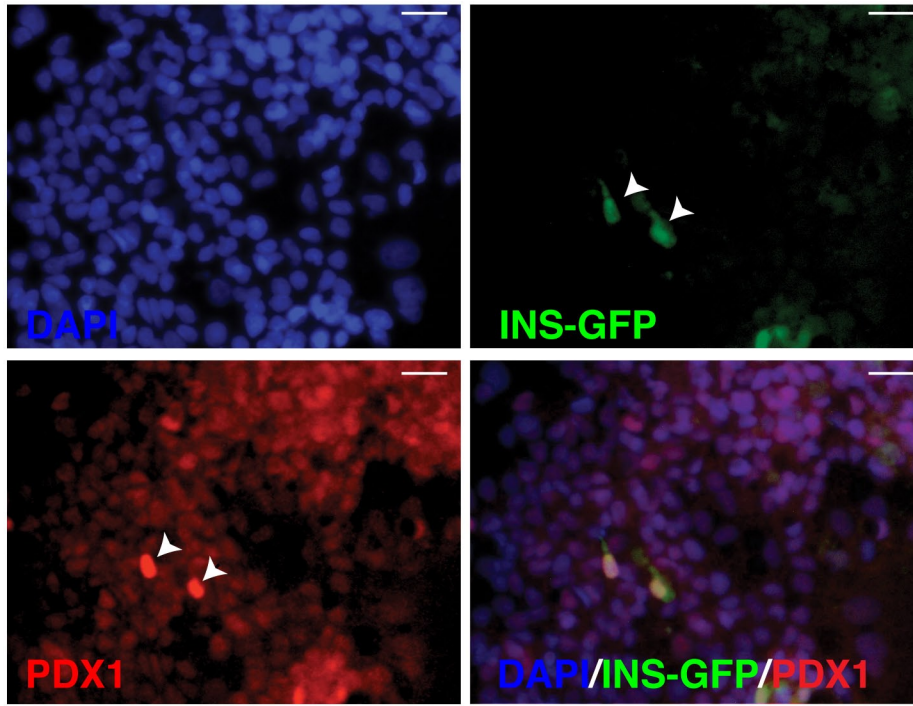

Supplement: MOESM5 [file 8090482]

Supplementary Figure 6

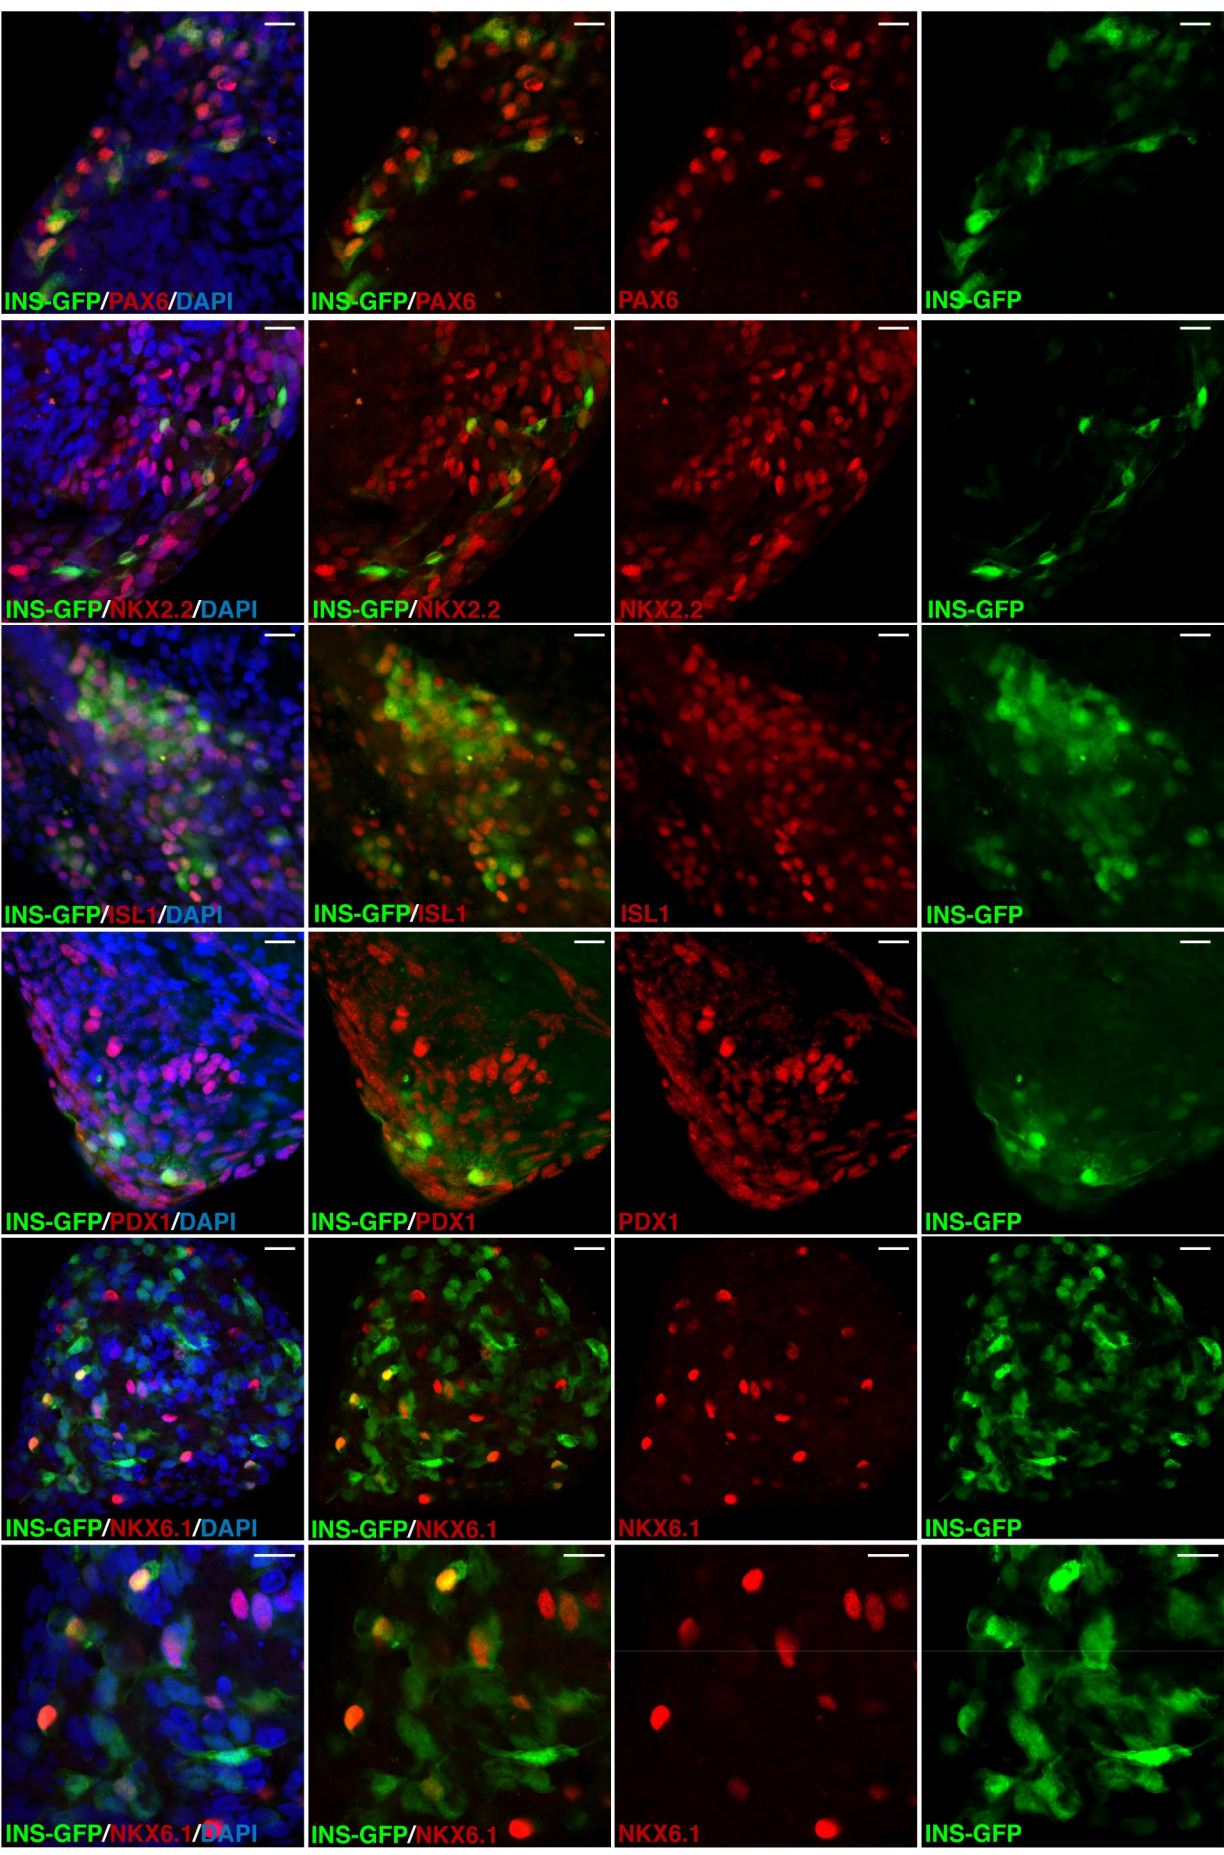

Supplement: MOESM6 [file 8090482]
